## **Sacsin cotranslational degradation causes**

### **autosomal recessive spastic ataxia of Charlevoix-Saguenay**

Fabiana Longo,<sup>1</sup> Daniele De Ritis,<sup>1</sup> Annarita Miluzio,<sup>2</sup> Davide Fraticelli,<sup>1</sup> Jonathan Baets,<sup>3,4,5</sup>

Marina Scarlato,<sup>6</sup> Filippo M. Santorelli,<sup>7</sup> Stefano Biffo,<sup>2,8</sup> and Francesca Maltecca<sup>1,9,#</sup>

1. Mitochondrial Dysfunctions in Neurodegeneration Unit, Ospedale San Raffaele, Milan, Italy;

2. Istituto Nazionale di Genetica Molecolare, INGM, "Romeo ed Enrica Invernizzi", Milan, Italy;

3. Translational Neurosciences, Faculty of Medicine and Health Sciences, UAntwerpen, Antwerp, Belgium;

4. Laboratory of Neuromuscular Pathology, Institute Born-Bunge, University of Antwerp, Antwerpen, Belgium;

5. Neuromuscular Reference Centre, Department of Neurology, Antwerp University Hospital, Antwerpen, Belgium;

6. Department of Neurology, Ospedale San Raffaele, Milan, Italy;

7. Molecular Medicine, IRCCS Fondazione Stella Maris, Pisa, Italy;

8. Department of Biosciences, University of Milan, Milan, Italy;

9. Università Vita-Salute San Raffaele, Milan, Italy.

# Correspondence to:

Francesca Maltecca, Mitochondrial Dysfunctions in Neurodegeneration Unit, Division of Neuroscience, Ospedale San Raffaele & Università Vita-Salute San Raffaele, Milan, Italy.

Tel +39-02-2643.9116. email:maltecca.francesca@hsr.it.

**Running title: Preemptive sacsin degradation in ARSACS**

**Final character count: 37212 (including spaces).**

## Abstract

Autosomal recessive spastic ataxia of Charlevoix-Saguenay is caused by more than 200 different mutations in the *SACS* gene encoding saccin, a huge multimodular protein of unknown function. ARSACS phenotypic spectrum is highly variable. Previous studies correlated the nature and position of *SACS* mutations with age of onset or disease severity, though the effects on protein stability were not considered.

In this study, we explain mechanistically the lack of genotype-phenotype correlation in ARSACS, with important consequences for disease diagnosis and treatment.

We found that saccin is almost absent in ARSACS fibroblasts, regardless of the nature of the mutation. We did not detect saccin in patients with truncating mutations, while we found it strikingly reduced or absent also in compound heterozygotes carrying diverse missense mutations. We excluded *SACS* mRNA decay, defective translation, or faster post-translational degradation as causes of protein reduction. Conversely, we demonstrated that nascent mutant saccin protein undergoes preemptive cotranslational degradation, emerging as a novel cause of a human disease. Based on these findings, saccin levels should be included in the diagnostic algorithm for ARSACS.

Keywords: autosomal recessive spastic ataxia of Charlevoix-Saguenay/ genotype-phenotype correlation/ molecular mechanisms of pathogenesis.

## Introduction

ARSACS is an early onset neurological disease first described in Québec (Canada), due to a founder effect (Bouchard et al., 1978), and is one of the most frequent recessive ataxias after the Friedreich's ataxia. Clinically, ARSACS is characterized by progressive cerebellar ataxia, spasticity and sensorimotor peripheral neuropathy. Most patients present with the above triad of symptoms, typically with early onset cerebellar ataxia followed by spasticity and later by neuropathy. However, the clinical spectrum is highly variable among patients, with an increasing number of diagnosed subjects with disease onset in early adult-years, or with a clinical presentation including only one or two of the three typical symptoms. Also, a minority of patients present intellectual disability, epileptic seizures, urinary dysfunction and hearing loss (Baets et al., 2010; Synofzik et al., 2013; Vermeer et al., 1993 updated 2020; Xiromerisiou et al., 2020).

ARSACS is caused by mutations in the *SACS* gene, which is one of the largest of our genome with a gigantic exon 10 of 12.8 kb (Engert et al., 2000) and nine smaller upstream exons. *SACS* gene encodes the 520 kDa multimodular protein saccin, highly expressed in the central nervous system and in particular in the cerebellum (Lariviere et al., 2019).

From the N-terminus to the C-terminus, the amino acid sequence of saccin contains: an ubiquitin-like (UbL) domain that binds to the proteasome (Parfitt et al., 2009), three saccin-repeating regions (SRR) having high homology with Hsp90 (Anderson et al., 2010), a Xeroderma Pigmentosus group C protein Binding (XPCB) domain (Greer et al., 2010), a DnaJ domain that binds Hsc70 (Parfitt et al., 2009) and a Higher Eukaryotes and Prokaryotes Nucleotide-binding (HEPN) domain (Kozlov et al., 2011). Despite the nature of these motifs suggests that saccin may operate in protein quality control, the cellular function of this protein and the pathophysiological consequences of its dysfunction remain largely unknown.

More than 200 mutations have been described worldwide to date, almost equally divided in homozygous or compound heterozygous (Xiromerisiou et al., 2020). The majority are missense, followed by small deletions, frameshift and nonsense and spread over the whole gene, as expected for a recessive disease. No clear-cut genotype-phenotype correlations have been identified in ARSACS so far (Baets et al., 2010; Bouhlal et al., 2011; Synofzik et al., 2013; Vermeer et al., 1993 updated 2020). Patients with macrodeletions that lead to loss of more than 3000 amino acids have similar phenotype to those that harbor single base insertion/deletions (indels) in the C-terminal end of the protein or that have missense substitutions (Bouhlal et al., 2011). Moreover, there are also reports of inter- or intrafamilial variability in patients with the same mutations (Bouhlal et al., 2011; Gagnon et al., 2018; Krygier et al., 2017).

Some studies have been published trying to correlate the pathogenicity and/or the position of the *SACS* mutations with the age of onset or the clinical severity of the disease. By analyzing genetic and clinical data from 70 ARSACS patients, Romano *et al.* suggested that subjects carrying missense mutations in homozygosity or heterozygosity with a null allele exhibit significantly milder phenotypes (evaluated by an arbitrary clinical score) than those carrying a truncating mutation on each allele. Moreover, they propose that mutations in the N-terminal part of the SRR domains impact more severely on ARSACS phenotype compared to those in the C-terminal part (Romano et al., 2013). In a more recent work, considering all the published ARSACS mutations up to 2019, Xiromerisiou *et al.* identified a correlation between the pathogenicity score of the mutations (calculated by computational algorithms), the phenotype severity and the age of onset (Xiromerisiou et al., 2020). However, these *in silico* studies have major limitations, since they did not consider the consequences of the various *SACS* mutations on saccin protein levels.

In this work, by employing both commercial and newly developed anti-sacsin antibodies, we demonstrated that sacsins is almost absent in a large panel of ARSACS fibroblasts, regardless of the nature and position of the mutation along the gene. We indeed did not detect sacsins (either full-length protein or truncated products) in patients with null mutations. Unexpectedly, we found it strikingly reduced (or completely absent) in compound heterozygotes carrying missense mutations. We excluded faster post-translational degradation of sacsins with missense mutations, as inhibition of cellular degradative pathways, as well as blockade of different classes of proteases, never rescued sacsins levels in ARSACS fibroblasts. Also, we detected comparable or even higher sacsins mRNA levels in patients with missense mutations compared to controls, excluding mRNA degradation. Polysome profiling revealed no evident defects in sacsins translation in ARSACS patients. Our data demonstrate that sacsins upon missense mutations undergoes cotranslational ubiquitination and degradation, and this event prevents the complete full-length sacsins production. To our knowledge, this is the first report in which this mechanism, still poorly characterized, has been formally demonstrated *in vivo* for a mammalian protein with pathogenetic mutations.

Overall, our data indicate that the phenotypic variability in ARSACS is not due to the different levels of residual sacsins or positional effect of the mutations. We provide evidence of a new molecular explanation of the lack of genotype-phenotype correlation in ARSACS patients, defining the loss of sacsins protein as a unifying mechanism shared by the different *SACS* mutations.

## Results

### **Full-length saccin protein is dramatically reduced in ARSACS patient fibroblasts regardless of the nature of the mutation**

To study the impact of *SACS* mutations on saccin levels, we derived skin fibroblasts from eleven compound heterozygous ARSACS patients, for a total of nineteen different mutations analyzed (**Fig. 1**). Detailed clinical features of patients are reported in **Table 1**. To have a broad picture of ARSACS genetics, we selected patients carrying mutations of different nature and localized in different domains of saccin: compound heterozygous for a missense on one allele and a truncating frameshift on the other allele (PN1, PN2, PN7), compound heterozygous for different truncating mutations (PN3, PN6a, PN6b), compound heterozygous for a missense mutation and a big deletion (PN4), compound heterozygous for truncating mutations and a big deletion (PN8a, PN8b), compound heterozygous for missense mutations only (PN5, PN9) (**Fig. 1**). PN6a and PN6b, and PN8a and PN8b are siblings, and despite carriers of the same mutation, they present phenotypic variability (**Table 1**).

Among the above-mentioned mutations, those carried by PN3 (p.[E723fs\*15];[F3209fs\*46]), PN6a and PN6b (p.[S1531fs\*9];[R1645\*]), PN8a and PN8b (p.[N1586fs\*3];[deleted\_allele]) and PN9 (p.[P536L];[R632W]) are reported in this study for the first time, at least in compound heterozygosity in the same patient. The other mutations are already published (PN1 and PN2 (Baets et al., 2010); PN4 (Terracciano et al., 2009); PN5 (Ricca et al., 2019); PN7 (Masciullo et al., 2012)) (**Fig. 1 and Table 1**).

To examine saccin protein levels in the different ARSACS patients, we performed Western Blot (WB) using a commercially available C-terminal anti-saccin antibody (AbC) (**Fig. 2A**) and a newly developed N-terminal anti-saccin antibody (AbN) (**Fig. 2B**) (epitopes shown on the saccin protein scheme in **Fig. 1**). AbN was designed and produced by our group, as no saccin N-terminal antibodies efficiently recognizing saccin in WB are commercially available.

To validate the specificity of AbN, we used saccin knockout (KO) HeLa and SH-SY5Y cells we engineered by CRISPR-Cas9 technology (right panel, **Fig. 2B**).

Strikingly, with both antibodies we found that full-length saccin protein is dramatically reduced or totally absent in all ARSACS patients, regardless of the nature of *SACS* mutations (**Fig. 2A and 2C**). This finding was unexpected for patients carrying monoallelic missense mutations, and even more for those carrying biallelic missense mutations.

We then employed the AbN to identify putative truncated products in patients carrying frameshift mutations on *SACS* gene. AbN recognizes a large epitope spanning the first saccin methionine residue, till the end of exon 9 (residue 1-728). This epitope contains the saccin UbL domain, a fairly common domain among proteins predicted to interact with the proteasome (Parfitt et al., 2009). AbN indeed recognizes other proteins carrying UbL domains (bands shared by controls and PNs in the WB in **Fig. 2B**). Considering the position of the premature stop codon for each mutation, the expected molecular weights of the saccin fragments are reported in the legend and highlighted as asterisks in AbN WBs in **Fig. 2B**. Despite the AbN efficiently recognizes full-length saccin protein, we were not able to appreciate any truncated saccin fragments in WB by using AbN in any of the patients carrying frameshift mutations (**Fig. 2B**).

### ***SACS* mRNA is reduced in ARSACS fibroblasts carrying frameshift mutations, while it is stable or even increased in those carrying missense mutations**

To understand if the absence of full-length saccin (and of truncated saccin products) in ARSACS fibroblasts was due to mRNA instability, we first analyzed *SACS* mRNA levels by real-time PCR (qRT-PCR).

In ARSACS patients carrying only truncating mutations, *SACS* mRNA was evidently reduced compared to controls (PN3, PN8a, PN8b, PN6a and PN6b), suggesting a Non-sense Mediated

Decay (NMD) of the mRNA. On the other hand, mRNA resulted stable (PN4, PN9) or even increased (PN5) in patients carrying missense mutations compared to controls. In ARSACS patients who are compound heterozygous for a missense and a frameshift mutation (PN1, PN2, PN7) we found no significant difference in the amount of *SACS* mRNA compared to controls, suggesting that the contribution of allele carrying the missense change determines the conserved amount of *SACS* mRNA (**Fig. 2D**).

### **Inhibition of degradative systems does not rescue saccin in ARSACS patients carrying missense mutations**

Since *SACS* mRNA is stable and saccin protein is dramatically reduced in ARSACS patients carrying missense mutations, we checked if mutant saccin could undergo a faster post-translational degradation. Unfolded or aberrant proteins are usually targeted by the proteasome system or the autophagic system, the main molecular pathways involved in protein quality control and maintenance of cellular proteostasis (Morimoto and Cuervo, 2014). To test this hypothesis, we blocked cellular degradative systems by treating patient cells either with a proteasome inhibitor (MG-132, 1  $\mu$ M, 24 or 3 hours) or an autophagy inhibitor (Chloroquine (CQ), 20  $\mu$ M, 24 hours) (**Fig. 3A and 3C**). Both treatments did not rescue mutant saccin in ARSACS patient fibroblasts carrying missense mutations. By blocking the proteasomal pathway for 24 hours, a statistically significant reduction of wild-type saccin levels was observed in controls (**Fig. 3A**, graph). This suggested us a possible inhibition of protein synthesis due to a prolonged MG-132 treatment and consequent cellular stress induction (Gandin et al., 2010). We thus repeated the blockade of the proteasome reducing the time of treatment to 3 hours. In this condition, saccin was stable in controls, but again not rescued in patients (**Fig. 3B**). We also blocked proteasome and autophagy together, but also in this case we did not see any increase in the amount of saccin protein in patients (**Fig. 3D**).



We then investigated if saccin could be degraded by specific proteases. We inhibited cysteine proteases with E64, amino peptidases with bestatin and aspartyl proteases with pepstatin. The low amount of mutant saccin in ARSACS patients was not modified by any of these treatments (**Fig. 3E**). We took in consideration that saccin carrying missense mutations could be completely translated, but undetectable by standard WB procedures due to its misfolding and/or aggregation. To address this hypothesis, we performed different experiments to solve aggregates in biochemical assays. We checked for putative mutant saccin aggregates by loading in SDS-PAGE both the soluble and the insoluble fractions of control and patient fibroblasts (PN1, PN2) obtained by pellet sonication (**Fig. 3F**) or by direct resuspension in Laemmli sample buffer (**Fig. 3G**). We were unable to detect saccin aggregates in the insoluble fractions in patient cells. We also performed WB using mixed acrylamide-agarose gel to solve aggregates without rescuing mutant saccin levels (not shown).

Altogether, these results indicate that the drastic reduction of mutant saccin in ARSACS patients is not caused either by a faster post-translational degradation of the protein or aggregation.

### **Translation of mutant saccin carrying missense mutations is not blocked in ARSACS patients**

At this point we considered that the absence of saccin carrying missense mutations could be due to its inefficient translation. We first excluded a general problem in translation, as polysomal profiles showed a similar pattern in ARSACS patients and controls (**Fig. 4A**). In order to know if wild-type *SACS* mRNA could be subjected to a translational regulation *per se*, we performed meta-analysis of ribosome profiling data downloaded and analyzed exploiting the GWIPS-viz platform (Michel et al., 2014). This analysis showed little accumulation of ribosomes in the 5'UTR of *SACS* mRNA, and a homogenous density of ribosomes across the

13737 nucleotide long mRNA sequence, suggesting the absence of strong regulatory sequences in the 5'UTR (**Fig. 4B**). To specifically assess the translation of saccin, we investigated if *SACS* mRNA carrying missense mutations was associated to intact ribosomes (polysomes) or split ribosomes (monosomes, due to a blockade of translation). We thus performed qRT-PCR for saccin on RNA extracted from the different ribosomal fractions (monosomes, light polysomes, heavy polysomes) for ARSACS patients and controls. We found that mutant *SACS* mRNA was associated to the polysomal fractions (the actively translating fractions) in ARSACS patients (PN4, PN5, PN9) as well as in controls (**Fig. 4C**, left), demonstrating that there is no blockade of its translation. The same mRNA distribution on the different ribosomal fractions was observed for a housekeeping gene (*TBP*) tested as control (**Fig. 4C**, right).

#### **Nascent mutant saccin products are cotranslationally ubiquitinated and degraded**

At this point, having experimentally excluded all the possible molecular mechanisms accounting for saccin reduction in ARSACS patients, we considered that mutant saccin could be degraded during translation. Two different quality control (QC) mechanisms exist during translation, both leading to the ubiquitination and degradation of nascent proteins. The first one, the ribosomal QC, is associated to the mRNA degradation and ribosome stalling/splitting (i.e the NMD, the No-Go Decay etc.) (Inada, 2017). The other one, the cotranslational QC, senses the correct folding of the nascent chain, promoting the degradation of the protein while it is being translated, and occurs in the presence of a stable mRNA associated to intact ribosomes (Wang et al., 2015). This second scenario is the most plausible in the case of mutant saccin carrying missense mutations, since we did not detect any reduction of the mRNA. Although poorly characterized, cotranslational QC is predicted to occur for big and multimodular proteins, whose folding takes place cotranslationally and proceeds in a domain-

wise manner (Liutkute et al., 2020). The players involved in nascent protein degradation associated to cotranslational QC are completely unknown so far.

As formal proof of the cotranslational degradation of saccin carrying missense mutations, we looked for the presence of ubiquitinated degradation products of nascent mutant saccin in ARSACS patient cells carrying missense mutations only. Thus, we immunoprecipitated saccin with AbN (in the view of recognizing N-terminal saccin fragments of unpredictable molecular weights) in ARSACS patients (PN5, PN9) versus controls. Since putative mutant saccin intermediates should be ubiquitinated and degraded by the proteasome, before the immunoprecipitation (IP) we treated cells with the proteasome inhibitor MG-132 (1 $\mu$ M, 3 hours) to improve their detection. We efficiently immunoprecipitated full-length saccin with AbN in control and (to a lower extent as expected) in patient cells (**Fig. 5A**). In ARSACS fibroblasts, saccin degradation products are detectable especially in the higher part of the gel, in particular with the anti-ubiquitin immunodecoration (**Fig. 5A**, right). To better resolve the higher part of the gel we decided to reload an independent saccin IP in a 6% gel (**Fig. 5B**). Saccin degradation products were clearly visible in the IP lanes of ARSACS patients, especially when immunodecorated with the AbN (**Fig. 5B**, left). To enhance saccin ubiquitination, we transfected control and patient cells with Ubiquitin-HA construct and immunoprecipitated saccin in the same conditions as before. We reconfirmed the detection of saccin degradation products in ARSACS patients (**Fig. 5C**) and, interestingly, we noticed that the differential bands present in the IP samples of patients were more evident by immunodecoration with anti-HA (revealing the ubiquitinated saccin products) (**Fig. 5C**, right).

According to our results, we can arrange a final model of the first event of ARSACS pathogenesis: in the presence of frameshift or nonsense mutations, *SACS* mRNA is degraded; in the presence of missense mutations, saccin fails to fold and undergoes cotranslational degradation (**Fig. 6**). In both cases the result is the absence/striking reduction of saccin.

## Discussion

In this work, we studied in detail for the first time the effects of different ARSACS-causing mutations on saccin stability, at both mRNA and protein level. The cohort of ARSACS patients that we analyzed encompasses a wide range of diverse types of *SACS* mutations localized in different regions of the gene. Our results demonstrate that saccin is barely detectable in ARSACS patients regardless of the nature or position of the mutation along the gene. While this result was expected for patients carrying biallelic truncating mutations (whose mRNA is unstable and degraded), it was not anticipated for patients carrying missense mutations, especially on both alleles. We indeed discovered that saccin carrying missense mutations in any site of its sequence is cotranslationally ubiquitinated and degraded, rarely reaching its mature size. We surmise that this mechanism prevents the even more dangerous production of a huge misfolded protein, potentially highly prone to aggregation in the crowded cytosolic environment.

Since ARSACS presents variability in its clinical presentation, efforts have been dedicated to find a genotype-phenotype correlation, to better tailor a precision medicine approach, in terms of disease prognosis, family counselling and for future clinical trials. Our data however do not confirm previous reports only based on *in silico* analyses correlating the nature and/or position of the *SACS* mutations with the severity of the disease (Romano et al., 2013; Xiomerisiou et al., 2020). Here, we demonstrated that loss of function in ARSACS is caused by loss/striking reduction of saccin, independently of the mutation.

Excluding the Quebec cohort, where the original c8844delT *SACS* mutation is highly prevalent, the 2020 worldwide ARSACS scenario shows that most mutations are missense, followed by small deletions, frameshift, nonsense and small insertions (Xiomerisiou et al., 2020). In our cohort of compound heterozygous patients, two of them carry biallelic missense mutations and

five of them monoallelic missense, for a total of nine different missense changes. In all cases, the full-length protein is almost absent in patients with missense mutations (hitting different regions of the protein, from the N-terminus to the C-terminus) as well as in patients with truncating mutations. Only in PN5 a residue of saccsin was detected with both AbC and AbN antibodies, which is anyway about 20% of controls, whereas in PN9 (who carries biallelic missense as well) saccsin is not detectable.

Our findings are supported by the recently published of *Sacs*<sup>R272C/R272C</sup> knockin mouse model, carrying a human pathogenetic mutation in the UbL domain (Lariviere et al., 2019). This model presents a barely detectable saccsin protein despite a stable mRNA and, accordingly, a phenotype overlapping with the one of the *Sacs* knockout mouse (Lariviere et al., 2015; Lariviere et al., 2019), confirming the conservation of the cotranslational degradation of mutant saccsin also in cerebellum. In addition, a striking reduction of saccsin was shown in other two reports of ARSACS mutations in patient fibroblasts (Duncan et al., 2017; Thiffault et al., 2013), with no further mechanistic insights.

We found that *SACS* mRNA was stable or even increased also in the ARSACS compound heterozygous patients carrying biallelic or monoallelic missense mutations, excluding mRNA degradation as the possible explanation for the absence of saccsin. The failure in rescuing full-length saccsin upon the inhibition of all cellular degradative systems and several proteases excluded faster post-translational degradation. Also, mRNA of saccsin turned out to be associated with polysomes in ARSACS patients as well as in controls, rejecting the hypothesis of defective translation. We instead discovered that saccsin protein carrying missense mutations is cotranslationally ubiquitinated and degraded.

To preserve proteostasis, eukaryotic cells must not only promote accurate folding, but also prevent the accumulation of misfolded species that may arise from inefficient folding, errors in translation, and aberrant mRNAs. A growing body of evidence indicates that large and

multimodular proteins start folding cotranslationally. For such proteins, domain-wise cotranslational folding helps reaching their native states (which would be otherwise highly challenging in the overcrowded cytosol) and may reduce the probability for off-pathways and aggregation-prone conformations (Liutkute et al., 2020; Pechmann et al., 2013; Waudby et al., 2019). Also, many studies indicate that a sizable portion of nascent chains are cotranslationally ubiquitinated and degraded by the proteasome in physiological conditions, both in yeast (Duttler et al., 2013; Willmund et al., 2013) and in mammalian cells (Wang et al., 2013). This likely applies to wild-type sarsin, a 520 kDa protein with a complex multimodular architecture containing repeated motifs, whose folding may take minutes to hours to complete. We hypothesize that cotranslational folding and degradation occur physiologically for sarsin as mechanisms of QC. In the case of sarsin carrying a missense mutation, after the unsuccessful attempts of chaperones to fold the nascent chain, the latter is constitutively ubiquitinated and degraded, preventing the synthesis of a misfolded full-length protein. This compartmentalized surveillance mechanism results in a loss-of-function, avoiding a potentially more dangerous toxic gain-of-function of mutant sarsin in the cytosol, which may promiscuously interact with non-specific proteins forming harmful aggregates.

We provided the formal proof of cotranslational degradation of mutant sarsin with the IP with AbN in condition of proteasome inhibition, which revealed the presence of several specific ubiquitinated sarsin products at lower molecular weight compared to the full-length in ARSACS patients carrying missense mutations.

The low residual amount of mutant sarsin that is present in some patients (PN5 and PN7), even if barely detectable, may be due to a quote of mutant protein escaping from cotranslational degradation, because C-terminally localized mutations are presumably more permissive. Indeed, the stability and susceptibility of different folding domains to degradation may vary depending on the polypeptide sequence (Wolff et al., 2014).

Other studies observed cotranslational ubiquitination of cystic fibrosis transmembrane conductance regulator (CFTR) carrying the  $\Delta F508$  mutation (Sato et al., 1998), wild-type apolipoprotein B100 (Zhou et al., 1998), and homeodomain interacting protein kinase 2 (HIPK2) carrying artificial mutations (Muller et al., 2021) by either *in vitro* translation or in overexpression conditions. To our knowledge this is the first report showing *in vivo* in endogenous conditions the cotranslational degradation of a cytosolic protein (carrying any type of missense mutation) as the cause of a human disease.

Our data identifies lack of saccin protein as unifying mechanism shared by different *SACS* mutations, with multiple important implications for ARSACS disease managing. For the diagnosis, the evaluation of saccin levels could be included in the clinical genetics practice to establish a definite ARSACS diagnosis, or even as pre-screening in high probable cases to avoid expensive next-generation sequencing panel analysis, and certainly to validate variants of uncertain clinical significance (VUS). For designing therapeutic strategies, cotranslational degradation of mutant saccin makes unproductive any post translational approach. Further studies are of course needed to explain the pronounced intra- and interfamily variability of ARSACS patients, such as the impact of gene modifiers, epigenetic factors and environmental differences on disease phenotype.

## **Materials and Methods**

### **Patient consent**

Subjects' consent was obtained according to the Declaration of Helsinki and was approved by the local ethical committee of Ospedale San Raffaele, IRCCS Stella Maris Pisa and the Antwerp University Hospital.

### **Human primary fibroblast derivation from skin biopsies and cell culture**

Patient-derived skin fibroblasts were obtained following standard protocols during diagnostic procedures. Fibroblasts were cultured in D-MEM medium supplemented with 20% FBS, 1mM sodium pyruvate, 2mM L-glutamine and 100 U/ml penicillin-streptomycin. All cell culture reagents were from Thermo Fisher Scientific (Waltham, MA, USA).

### **Human primary skin fibroblasts immortalization**

For polysomal profiling and IP experiments we used immortalized fibroblasts. Cells were transduced with a lentiviral vector, kindly gifted by Mario Squadrito's lab (1:2500; initial concentration  $6 \times 10^9$  TU/mL) carrying SV-40 gene under the spleen focus forming virus (SFFV) promoter. Growth of cells was observed and compared to non-transduced human primary skin fibroblasts.

### **Antibodies, drugs and reagents**

Commercially available antibodies were used in Western blots (WB), for the detection of saccin (Anti-saccin AbC ab181190. Abcam, Cambridge, UK), spectrin (Anti-spectrin MAB1622 Merck Millipore, Burlington, MA, USA), ubiquitinated proteins (Anti-ubiquitin ab134953, Abcam), p62 (Anti-p62/SQSTM1 P0067 Merck Millipore), LC3I-II (Anti-LC3A/B ab58610. Abcam), HA (anti-HA Epitope Tag 16b12, Biolegend, San Diego, CA, USA). Secondary antibodies included HRP-conjugated anti-mouse and anti-rabbit IgG (Amersham Bioscience, Buckinghamshire, UK).

*In vitro* treatments were carried out with different compounds: 1  $\mu$ M MG-132 24 hours or 3 hours (Merck Millipore), 20  $\mu$ M Chloroquine (CQ) 24 hours (Merck Millipore) or together (0.25  $\mu$ M MG-132 + 10  $\mu$ M CQ, 18 hours); protease inhibitors (5  $\mu$ M E64, 10  $\mu$ M Bestatin, 5  $\mu$ M Pepstatin, 48 hours (Merck Millipore)). After the treatments, cells were harvested and lysed for biochemical assays.



### **Cell lysis, SDS-PAGE and WB analyses**

Cells were lysed as previously described (Longo et al., 2020). Protein quantification was performed with Bradford assay accordingly to the manufacturer's instructions. Samples were resuspended in SDS sample buffer (5.8 mM TrisHCl pH 6.8, 5% glycerol, 1.6% SDS, 0.1 M DTT, 0.002% bromophenol blue), boiled and loaded onto SDS-PAGE followed by immunoblot.

### **Anti N-terminal saccin antibody (AbN) generation**

We generated a new rabbit polyclonal anti-saccin antibody recognizing the N-terminal portion of saccin (ID Q9NZJ4 (SACS\_HUMAN)). We decided to develop a new anti-saccin antibody (AbN) raised against a polypeptidic region of saccin including aminoacids from 1 to 728 (all the exons till the giant exon 10). The antibody was produced by the antibody production service of Biomatik (Cambridge, Ontario, Canada).

### **Protein aggregate detection**

Cells were lysed by using Dounce homogenizer in 100 mM Tris-HCl pH 7.4, 150 mM NaCl, 1 mM EDTA pH 8 + protease inhibitor cocktail (Merck Millipore), centrifugated 1000g x 10 minutes. Post-nuclear supernatant (PNS) was collected, and pellets were resuspended in 500  $\mu$ L lysis buffer and sonicated (20 seconds pulse-10 seconds stop; repeated twice) or directly resuspended in SDS sample buffer. PNS and pellet were quantified and equal amount were loaded on SDS-PAGE.

### **SACS deletion by CRISPR/Cas9**

Traditional 20 bp-NGG spCas9 gRNAs targeting *SACS* coding region were designed with CHOPCHOP web tool. The gRNA sequences were: gRNA-1 5' TGCTCCTGCGGTTATCAGTA 3'; gRNA-2 5' GTAGGCCATGCAATTCTCAT 3'. Oligos encoding the gRNAs were annealed and cloned into pCas-Guide-EF1a-GFP CRISPR/Cas9 plasmid (OriGene), according to the manufacturer instructions. To delete *SACS* gene, HeLa cells and SH-SY5Y cells were transfected with CRISPR/Cas9 plasmid carrying gRNA-1 or gRNA-2, with Metafectene PRO (Biontex) and Lipofectamine 3000 (ThermoFisher Scientific) respectively. Two days after transfection, GFP positive cells were sorted by FACS Aria Fusion (Becton Dickinson), and plated at single cell density in 96-multiwell plates. Monoclonal cell lines were expanded from wells with single colonies and saccin KO was validated by immunoblot with AbC antibody and by Sanger sequencing of target genomic region. Primers for gRNA-1 target region were: forward primer 5' AGCAAAAGGAGCAACGTCTG 3'; reverse primer 5' GCTCTTTTCCATCTCCAGACG 3'. Primers for gRNA-2 target region were: forward primer 5' AGCCAAAACCCTCTTACTGG 3'; reverse primer 5' AGTGGCTCTCTTTGTCCTGA 3'.

### **RNA extraction and Real Time-PCR (qRT- PCR)**

Total mRNA from primary fibroblasts was extracted with Trizol Reagent following manufacturer's instructions. RNA was reverse transcribed in cDNA using SuperScript IV Reverse Transcriptase (ThermoFisher Scientific) with random hexamers. For each reverse transcription experiment, *GAPDH* PCR was performed to check the cDNA and its absence in the non-reverse transcribed samples to avoid genomic DNA contamination (not shown). *GAPDH* primers: forward primer 5' CCACCCAGAAGACTGTGGAT 3'; reverse primer 5' GTTGAAGTCAGAGGAGACCACC 3'. qRT- PCR was performed based on SYBR Green chemistry (Light Cycler 480. SYBR Green I master, Roche). *SACS* primers for the analysis of

total *SACS* mRNA levels in patients and controls were: forward primer 5' TTTTCAGTTGCGAGGGGTTG 3'; reverse primer 5' TCCTGGCTTGGGAGGTAAAG 3'.

To normalize *SACS* mRNA levels, we used TATA Binding Protein (*TBP*) mRNA levels. *TBP* forward primer 5' ACGCCGAATATAATCCCAAG 3'; reverse primer 5' GCACACCATTTTCCCAGAAC 3'.

### **Polysomal profile analysis**

Immortalized growing fibroblasts were treated with 100 µg/mL cycloheximide for 15 minutes and lysed on ice in 50 mM TrisHCl pH 7.5, 100mM NaCl, 30 mM MgCl<sub>2</sub>, 0.1% NP-40, 100 µg/mL cycloheximide, 40 U/mL RNasin (Promega) and protease inhibitor cocktail (Merck Millipore). After centrifugation at 14000 g for 10 minutes at 4°C, the supernatants with equal amounts of RNA were loaded on a 15–50% sucrose gradient and centrifuged at 4°C in a SW41Ti Beckman rotor for 3 hours 30 minutes at 39000 rpm. The gradients were analyzed by continuous flow absorbance at 254 nm, recorded by BioLogic LP software (Bio-Rad), and all fractions were collected for the subsequent examination of translated mRNAs. Briefly, these fractions were divided into monosomes, (from the top of the gradient to the 80S peak), light polysomes and heavy polysomes. Samples were incubated with proteinase K and 1% SDS for 1 hour at 37°C. RNA was extracted by phenol/chloroform/isoamyl alcohol method. After treatment of RNA with RQ1 RNase-free DNase (Promega), reverse transcription was performed according to SuperScript III First-Strand Synthesis kit instructions (Thermo Fisher Scientific). Complementary cDNA (100 ng) was amplified with the appropriate SYBR green specific primers. To analyze *SACS* mRNA, different specific primers were used: forward primer 5' GGCAATTTTGTCCTTCTCC 3' reverse primer 5' GGTCTTCCTCGGGTTTGGG 3'. qRT-PCR for *TBP* (as housekeeping gene) was used as

control of translation. For the analysis of targets from monosome and polysome fractions, the data are quantified as the percentage of expression in each fraction.

### **Immunoprecipitation of N-terminal sacsin fragments**

Immortalized fibroblasts (transfected for 16 hours with Ubiquitin-HA plasmid or not) were plated in T75 flasks ( $4.5 \times 10^6$  cells) and after 24 hours were treated for 3 hours with 1  $\mu$ M MG-132 and harvested. Cells were lysed in RIPA buffer, then incubated for 30 minutes on ice and centrifuged at 8000 g for 10 minutes. Supernatant was collected and quantified by Bradford standard procedures. The lysate was incubated for 2 hours in a rotating wheel at 4°C with Dynabeads Protein A (#10002D Dynabeads Protein A, ThermoFisher Scientific) as a preclearing step. A different aliquot of Dynabeads Protein A was incubated with AbN (6  $\mu$ g of antibody per 700  $\mu$ g of protein) for 30 minutes at room temperature and then washed in RIPA buffer. Precleared lysates were then incubated overnight at 4°C on a wheel with Dynabeads Protein A-AbN. The day after, unbound proteins were collected as flow through (FT) while the immunoprecipitated proteins (IP) were washed 5 times in RIPA buffer and then eluted in strong elution buffer (8 M Urea, 100 mM Tris HCl pH 8), followed by separation onto SDS-PAGE. Ubiquitin-HA plasmid was kindly provided by S. Polo's lab, IFOM, Milan.

### **Statistical analyses**

Continuous variables were summarized by their mean values and Standard Error of the Mean (SEM). Differences in protein levels between patients and controls were assessed by densitometric analysis of WB bands from at least three independent experiments using Image J, followed by student *t*-test analysis.

## **Acknowledgements**

We thank all patients for collaborating with this study. We thank Ignazio Lopez for deriving skin biopsies from patients. We are grateful to Roberto Sitia for critical discussion.

This project was supported by the Italian Ministry of Health # RF-2016-02361610 and Ataxia Charlévoix-Saguenay Foundation (FM). FL was recipient of a Fondazione Centro San Raffaele- Fronzaroli fellowship. This work was supported by the Association Belge contre les Maladies Neuromusculaire (ABMM) and the EU Horizon 2020 program (Solve-RD, No 779257). JB is supported by a Senior Clinical Researcher mandate of the Research Fund - Flanders (FWO) under grant agreement number 1805021N. JB is a member of the  $\mu$ NEURO Research Centre of Excellence of the University of Antwerp and of European Reference Network for Rare Neuromuscular Diseases (ERN EURO-NMD).

## **Author contributions**

FM, SB and FL conceived the study, interpreted the results and wrote the manuscript. FL, DDR, AM, DF performed the experiments, analyzed data and helped writing the manuscript. JB, MS and FS are patient neurologists and provided skin biopsies. All authors critically discussed the data.

## **Conflict of Interest**

The authors declare no competing interests.

## **The paper explained**

**PROBLEM.** ARSACS is a neurodegenerative disorder characterized by cerebellar ataxia, spasticity and peripheral neuropathy. It is caused by mutations in the *SACS* gene encoding

sacsin, a huge multimodular protein of unknown function. More than 200 *SACS* mutations have been described worldwide, making ARSACS the second most common form of recessive ataxia after Friedreich's ataxia. ARSACS phenotypic spectrum is highly variable among patients, in terms of severity and clinical presentation.

**RESULTS.** In this study, we demonstrated that the clinical variability in ARSACS does not depend on the type/position of the *SACS* mutations. We indeed we found that sacsins is almost absent in a large set of ARSACS patient skin fibroblasts, regardless of the nature of the mutation. This is caused by a premature degradation of sacsins, which emerges as a novel cause of a human disease.

**IMPACT.** Our data explain the mechanism underlying the lack of genotype-phenotype correlation in ARSACS. We propose that sacsins level should be evaluated to define ARSACS diagnosis. Moreover, our results make unproductive any translational approach targeting mutant sacsins.

## **For more information**

OMIM database:

ARSACS: <https://www.omim.org/entry/270550>

*SACS*: <https://www.omim.org/entry/604490>

[www.hgmd.cf.ac.uk](http://www.hgmd.cf.ac.uk)

<https://www.lovd.nl>

<https://chopchop.cbu.uib.no>

[imagej.nih.gov/ij/index.html](http://imagej.nih.gov/ij/index.html)

<https://gwips.ucc.ie/>

## **References**

- Anderson, J.F., Siller, E., Barral, J.M., 2010. The saccin repeating region (SRR): a novel Hsp90-related supra-domain associated with neurodegeneration. *J Mol Biol* 400, 665-674.
- Baets, J., Deconinck, T., Smets, K., Goossens, D., Van den Bergh, P., Dahan, K., Schmedding, E., Santens, P., Rasic, V.M., Van Damme, P., Robberecht, W., De Meirleir, L., Michielsens, B., Del-Favero, J., Jordanova, A., De Jonghe, P., 2010. Mutations in SACS cause atypical and late-onset forms of ARSACS. *Neurology* 75, 1181-1188.
- Bouchard, J.P., Barbeau, A., Bouchard, R., Bouchard, R.W., 1978. Autosomal recessive spastic ataxia of Charlevoix-Saguenay. *Can J Neurol Sci* 5, 61-69.
- Bouhlal, Y., Amouri, R., El Euch-Fayeche, G., Hentati, F., 2011. Autosomal recessive spastic ataxia of Charlevoix-Saguenay: an overview. *Parkinsonism Relat Disord* 17, 418-422.
- Duncan, E.J., Lariviere, R., Bradshaw, T.Y., Longo, F., Sgarioto, N., Hayes, M.J., Romano, L.E.L., Nethisinghe, S., Giunti, P., Bruntraeger, M.B., Durham, H.D., Brais, B., Maltecca, F., Gentil, B.J., Chapple, J.P., 2017. Altered organization of the intermediate filament cytoskeleton and relocalization of proteostasis modulators in cells lacking the ataxia protein saccin. *Hum Mol Genet* 26, 3130-3143.
- Duttler, S., Pechmann, S., Frydman, J., 2013. Principles of cotranslational ubiquitination and quality control at the ribosome. *Mol Cell* 50, 379-393.
- Engert, J.C., Berube, P., Mercier, J., Dore, C., Lepage, P., Ge, B., Bouchard, J.P., Mathieu, J., Melancon, S.B., Schalling, M., Lander, E.S., Morgan, K., Hudson, T.J., Richter, A., 2000. ARSACS, a spastic ataxia common in northeastern Quebec, is caused by mutations in a new gene encoding an 11.5-kb ORF. *Nat Genet* 24, 120-125.
- Gagnon, C., Brais, B., Lessard, I., Lavoie, C., Cote, I., Mathieu, J., 2018. From motor performance to participation: a quantitative descriptive study in adults with autosomal recessive spastic ataxia of Charlevoix-Saguenay. *Orphanet J Rare Dis* 13, 165.
- Gandin, V., Brina, D., Marchisio, P.C., Biffo, S., 2010. JNK inhibition arrests cotranslational degradation. *Biochim Biophys Acta* 1803, 826-831.
- Greer, P.L., Hanayama, R., Bloodgood, B.L., Mardinly, A.R., Lipton, D.M., Flavell, S.W., Kim, T.K., Griffith, E.C., Waldon, Z., Maehr, R., Ploegh, H.L., Chowdhury, S., Worley, P.F., Steen, J., Greenberg, M.E., 2010. The Angelman Syndrome protein Ube3A regulates synapse development by ubiquitinating arc. *Cell* 140, 704-716.
- Inada, T., 2017. The Ribosome as a Platform for mRNA and Nascent Polypeptide Quality Control. *Trends Biochem Sci* 42, 5-15.
- Kozlov, G., Denisov, A.Y., Girard, M., Dicaire, M.J., Hamlin, J., McPherson, P.S., Brais, B., Gehring, K., 2011. Structural basis of defects in the saccin HEPN domain responsible for autosomal recessive spastic ataxia of Charlevoix-Saguenay (ARSACS). *J Biol Chem* 286, 20407-20412.
- Krygier, M., Konkel, A., Schinwelski, M., Rydzanicz, M., Walczak, A., Sildatke-Bauer, M., Ploski, R., Slawek, J., 2017. Autosomal recessive spastic ataxia of Charlevoix-Saguenay (ARSACS) - A Polish family with novel SACS mutations. *Neurol Neurochir Pol* 51, 481-485.
- Lariviere, R., Gaudet, R., Gentil, B.J., Girard, M., Conte, T.C., Minotti, S., Leclerc-Desaulniers, K., Gehring, K., McKinney, R.A., Shoubridge, E.A., McPherson, P.S., Durham, H.D., Brais, B., 2015. Sacs knockout mice present pathophysiological defects underlying autosomal recessive spastic ataxia of Charlevoix-Saguenay. *Hum Mol Genet* 24, 727-739.
- Lariviere, R., Sgarioto, N., Marquez, B.T., Gaudet, R., Choquet, K., McKinney, R.A., Watt, A.J., Brais, B., 2019. Sacs R272C missense homozygous mice develop an ataxia phenotype. *Mol Brain* 12, 19.
- Liutkute, M., Samatova, E., Rodnina, M.V., 2020. Cotranslational Folding of Proteins on the Ribosome. *Biomolecules* 10.
- Longo, F., Benedetti, S., Zambon, A.A., Sora, M.G.N., Di Resta, C., De Ritis, D., Quattrini, A., Maltecca, F., Ferrari, M., Previtali, S.C., 2020. Impaired turnover of hyperfused

- mitochondria in severe axonal neuropathy due to a novel DRP1 mutation. *Hum Mol Genet* 29, 177-188.
- Masciullo, M., Modoni, A., Tessa, A., Santorelli, F.M., Rizzo, V., D'Amico, G., Laschena, F., Tartaglione, T., Silvestri, G., 2012. Novel SACS mutations in two unrelated Italian patients with spastic ataxia: clinico-diagnostic characterization and results of serial brain MRI studies. *Eur J Neurol* 19, e77-78.
- Michel, A.M., Fox, G., A, M.K., De Bo, C., O'Connor, P.B., Heaphy, S.M., Mullan, J.P., Donohue, C.A., Higgins, D.G., Baranov, P.V., 2014. GWIPS-viz: development of a ribo-seq genome browser. *Nucleic Acids Res* 42, D859-864.
- Morimoto, R.I., Cuervo, A.M., 2014. Proteostasis and the aging proteome in health and disease. *J Gerontol A Biol Sci Med Sci* 69 Suppl 1, S33-38.
- Muller, J.P., Scholl, S., Kunick, C., Klempnauer, K.H., 2021. Expression of protein kinase HIPK2 is subject to a quality control mechanism that acts during translation and requires its kinase activity to prevent degradation of nascent HIPK2. *Biochim Biophys Acta Mol Cell Res* 1868, 118894.
- Parfitt, D.A., Michael, G.J., Vermeulen, E.G., Prodromou, N.V., Webb, T.R., Gallo, J.M., Cheetham, M.E., Nicoll, W.S., Blatch, G.L., Chapple, J.P., 2009. The ataxia protein saccin is a functional co-chaperone that protects against polyglutamine-expanded ataxin-1. *Hum Mol Genet* 18, 1556-1565.
- Pechmann, S., Willmund, F., Frydman, J., 2013. The ribosome as a hub for protein quality control. *Mol Cell* 49, 411-421.
- Ricca, I., Morani, F., Bacci, G.M., Nesti, C., Caputo, R., Tessa, A., Santorelli, F.M., 2019. Clinical and molecular studies in two new cases of ARSACS. *Neurogenetics* 20, 45-49.
- Romano, A., Tessa, A., Barca, A., Fattori, F., de Leva, M.F., Terracciano, A., Storelli, C., Santorelli, F.M., Verri, T., 2013. Comparative analysis and functional mapping of SACS mutations reveal novel insights into saccin repeated architecture. *Hum Mutat* 34, 525-537.
- Sato, S., Ward, C.L., Kopito, R.R., 1998. Cotranslational ubiquitination of cystic fibrosis transmembrane conductance regulator in vitro. *J Biol Chem* 273, 7189-7192.
- Synofzik, M., Soehn, A.S., Gburek-Augustat, J., Schicks, J., Karle, K.N., Schule, R., Haack, T.B., Schoning, M., Biskup, S., Rudnik-Schoneborn, S., Senderek, J., Hoffmann, K.T., MacLeod, P., Schwarz, J., Bender, B., Kruger, S., Kreuz, F., Bauer, P., Schols, L., 2013. Autosomal recessive spastic ataxia of Charlevoix Saguenay (ARSACS): expanding the genetic, clinical and imaging spectrum. *Orphanet J Rare Dis* 8, 41.
- Terracciano, A., Casali, C., Grieco, G.S., Orteschi, D., Di Giandomenico, S., Seminara, L., Di Fabio, R., Carozzo, R., Simonati, A., Stevanin, G., Zollino, M., Santorelli, F.M., 2009. An inherited large-scale rearrangement in SACS associated with spastic ataxia and hearing loss. *Neurogenetics* 10, 151-155.
- Thiffault, I., Dicaire, M.J., Tetreault, M., Huang, K.N., Demers-Lamarche, J., Bernard, G., Duquette, A., Lariviere, R., Gehring, K., Montpetit, A., McPherson, P.S., Richter, A., Montermini, L., Mercier, J., Mitchell, G.A., Dupre, N., Prevost, C., Bouchard, J.P., Mathieu, J., Brais, B., 2013. Diversity of ARSACS mutations in French-Canadians. *Can J Neurol Sci* 40, 61-66.
- Vermeer, S., van de Warrenburg, B.P., Kamsteeg, E.J., Brais, B., Synofzik, M., 1993 updated 2020. Arsacs, in: Adam, M.P., Ardinger, H.H., Pagon, R.A., Wallace, S.E., Bean, L.J.H., Stephens, K., Amemiya, A. (Eds.), *GeneReviews*(R), Seattle (WA).
- Wang, F., Canadeo, L.A., Huibregtse, J.M., 2015. Ubiquitination of newly synthesized proteins at the ribosome. *Biochimie* 114, 127-133.
- Wang, F., Durfee, L.A., Huibregtse, J.M., 2013. A cotranslational ubiquitination pathway for quality control of misfolded proteins. *Mol Cell* 50, 368-378.



Waudby, C.A., Dobson, C.M., Christodoulou, J., 2019. Nature and Regulation of Protein Folding on the Ribosome. *Trends Biochem Sci* 44, 914-926.

Willmund, F., del Alamo, M., Pechmann, S., Chen, T., Albanese, V., Dammer, E.B., Peng, J., Frydman, J., 2013. The cotranslational function of ribosome-associated Hsp70 in eukaryotic protein homeostasis. *Cell* 152, 196-209.

Wolff, S., Weissman, J.S., Dillin, A., 2014. Differential scales of protein quality control. *Cell* 157, 52-64.

Xiromerisiou, G., Dadouli, K., Marogianni, C., Provatas, A., Ntellas, P., Rikos, D., Stathis, P., Georgouli, D., Loules, G., Zamanakou, M., Hadjigeorgiou, G.M., 2020. A novel homozygous SACS mutation identified by whole exome sequencing-genotype phenotype correlations of all published cases. *J Mol Neurosci* 70, 131-141.

Zhou, M., Fisher, E.A., Ginsberg, H.N., 1998. Regulated Co-translational ubiquitination of apolipoprotein B100. A new paradigm for proteasomal degradation of a secretory protein. *J Biol Chem* 273, 24649-24653.

## Figure Legends

### Figure 1. ARSACS patient fibroblasts analyzed in this study.

Scheme of *SACS* gene and saccin protein illustrating the identified functional domains and corresponding exons. For each patient (see **Table 1**), the type and position of the mutations on saccin protein are indicated with a symbol and a color code. AbN and AbC antibodies used in this study are shown (bottom).

Abbreviations: PN: patient; AbN/C: N/C-terminal anti-saccin antibody; UbL: Ubiquitin-Like domain; SRR: Saccin Repeating Region; XPCB: Xeroderma Pigmentosus group C protein Binding domain; HEPN: Higher Eukaryotes and Prokaryotes Nucleotide-binding domain; bp: base pair; aa: aminoacid.

### Figure 2. Saccin protein is drastically reduced in ARSACS fibroblasts carrying different *SACS* mutations.

(A) Representative WB showing residual saccin protein in ARSACS patient-derived primary fibroblasts versus controls by using a C-terminal anti-saccin antibody (AbC). Spectrin is used as loading normalizer. (B) Representative WB showing residual saccin protein in ARSACS

patient-derived primary fibroblasts versus controls by using AbN. Asterisks indicate the expected truncated saccin protein: PN1=412 kDa; PN2=8 kDa; PN3=81kDa,358 kDa; PN6a and PN6b=170 kDa,180 kDa; PN7=410 kDa; PN8a and PN8b=175 kDa. (C) Quantification of saccin levels relative to spectrin in WB experiments by using AbC and AbN. (D) *SACS* mRNA quantification by qRT-PCR in ARSACS patient-derived primary fibroblasts versus controls, normalized on *TBP* mRNA levels.

In (C-D), data are presented as mean  $\pm$  SEM. \* $p \leq 0.05$ ; \*\* $p < 0.01$ ; \*\*\* $p < 0.001$ , \*\*\*\* $p < 0.0001$  (unpaired-two tailed Student's t-test). Abbreviation: Ctr = control.

### **Figure 3. Mutant saccin is not post-translationally degraded or aggregated.**

(A) Representative WB and quantification of saccin levels in patient and control fibroblasts after proteasome blockade experiments, by using 1  $\mu$ M MG-132 for 24 hours. Ubiquitinated proteins are used as readout of the treatment and spectrin as loading normalizer. (B) Representative WB and quantification of saccin levels in patient and control fibroblasts after proteasome blockade experiments, by using 1  $\mu$ M MG-132 for 3 hours. Ubiquitinated proteins are used as readout of the treatment. (C) Representative WB and quantification of saccin levels in patient and control fibroblasts after autophagy blockade experiments, by using 20  $\mu$ M Chloroquine (CQ) for 24 hours. LC3I conversion in LC3II is used as readout of the treatment. (D) Representative WB of saccin levels in patient and control fibroblasts upon proteasome plus autophagy blockade, by using 0.5  $\mu$ M MG-132 and 10  $\mu$ M CQ for 18 hours. P62 is used as readout of the CQ treatment and ubiquitinated proteins of the MG-132 treatment. (E) Representative WB of saccin levels in patient and control fibroblasts upon protease inhibition by using different protease inhibitors for 48 hours (repeating the treatment at 24 hours). (F) Representative WB of saccin levels in patient and control soluble and insoluble fractions, obtained by pellet sonication. Asterisk represents a leak of material from the adjacent well. (G)

Representative WB of saccin levels in patient and control soluble and insoluble fractions resuspended in Laemmli sample buffer. In (A–C), data are presented as mean  $\pm$  SEM. n=at least 3, \* $p \leq 0.05$  (unpaired-two tailed Student's t-test).

Abbreviations: + = treated; - = vehicle; BEST= bestatin; PEPS= pepstatin; PNS= post-nuclear supernatant; IF= insoluble fraction.

**Figure 4. *SACS* mRNA carrying missense mutations is associated to the polysomal fractions.**

(A) Representative ribosomal profile graphs in control (left) and ARSACS patient fibroblasts (right). (B) Ribosomal density on the human saccin mRNA, retrieved and analyzed from available riboseq datasets. (C) qRT-PCR data of the *SACS* mRNA distribution in different ribosomal fractions: monosomes, light and heavy polysomes in ARSACS patient fibroblasts (PN4, PN5, PN9) compared to 3 different controls (left). *TBP* mRNA distribution is shown as housekeeping gene analyzed in the same cells (right).

**Figure 5. Saccin protein carrying missense mutations is co-translationally ubiquitinated and degraded.**

(A) Saccin IP by using AbN in ARSACS patient fibroblasts carrying missense mutations (PN5, PN9) and a control treated with 1  $\mu$ M MG-132 for 3 hours. 4-12 % gradient gel showing proteins from high molecular weights to 15 kDa, immunodecorated with AbN (left) or ubiquitin (right). (B) Independent experiment conducted in the same conditions loaded onto a 6% gel to resolve putative differential N-terminal saccin bands in patients compared to control. Immunodecoration with AbN (left WB) or ubiquitin (right WB, red asterisks indicate N-terminal saccin products visible only in the patient IP samples). (C) Saccin IP by using AbN in ARSACS patient fibroblasts carrying missense mutations (PN5, PN9) and a control upon

Ubiquitin-HA overexpression, treated with 1  $\mu$ M MG-132 for 3 hours. 6 % gel showing immunodecoration with AbN (left) and with anti-HA revealing ubiquitinated proteins (right). Red asterisks indicate differential N-terminal saccin products visible only in the patient IP samples.

Abbreviations: IP: immunoprecipitation; FT: Flow through fractions; IB: immunoblotting.

**Figure 6. Full length saccin protein is almost absent in ARSACS patients, independently of the nature of the mutations**

Final model explaining why mutant saccin is almost absent in patient cells. In (1) saccin is prevented to be translated because the *SACS* mRNA carrying frameshift mutations is degraded by nucleases, while in (2) the *SACS* mRNA carrying missense mutations is stable and saccin is cotranslationally degraded. The proteasome is the degradative system implied in these pathways (drawn in orange). Green nascent chain: before sensing the mutation; red nascent chain: after sensing domain misfolding.

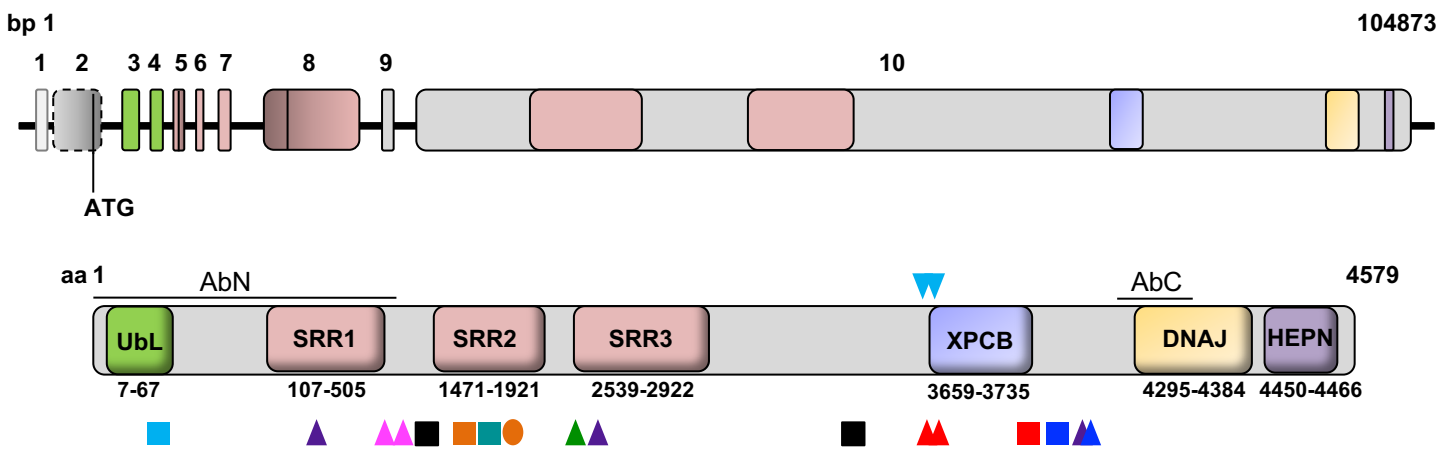

- PN1 ■ ▲ ▲
- PN2 ■ ▲ ▲
- PN3 ■ ■
- PN4 ▲
- PN5 ▲ ▲ ▲
- PN6a ■ ●
- PN6b ■ ●
- PN7 ■ ▲
- PN8a ■
- PN8b ■
- PN9 ▲ ▲

- frameshift ■
- missense ▲
- nonsense ●

Figure 1

**A**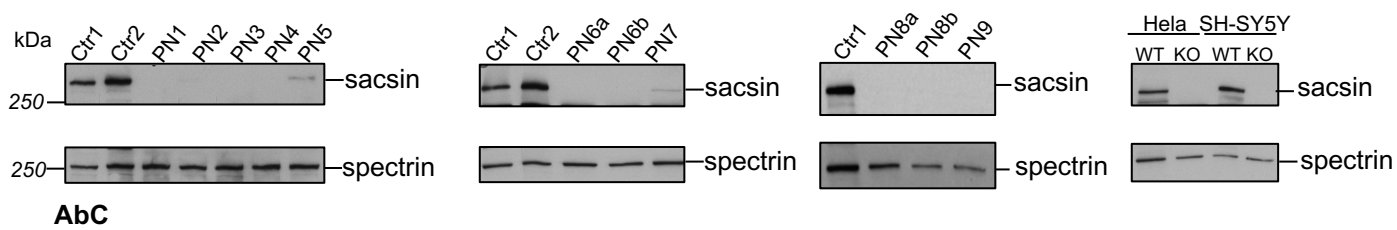**B**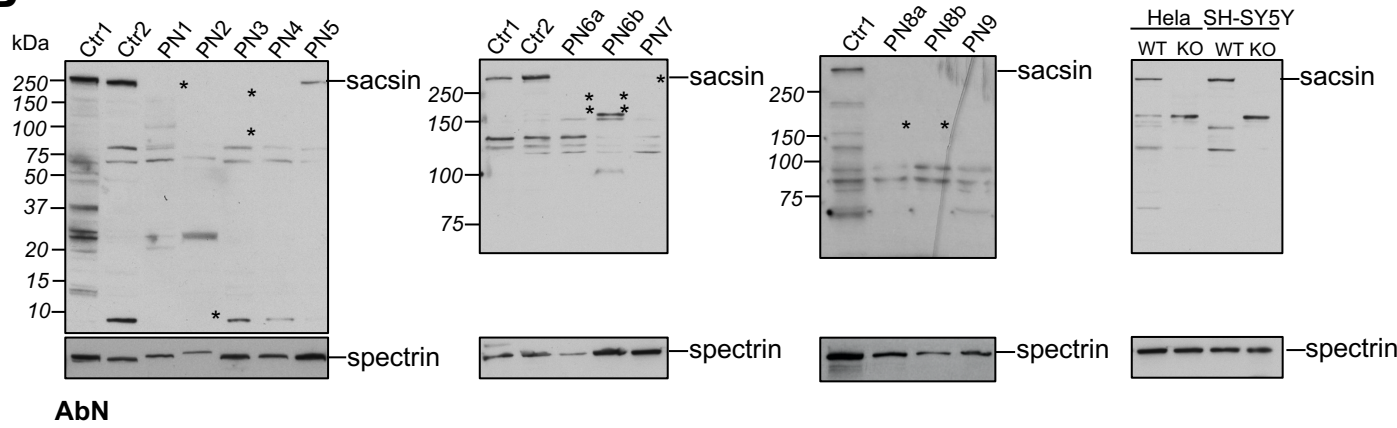**C**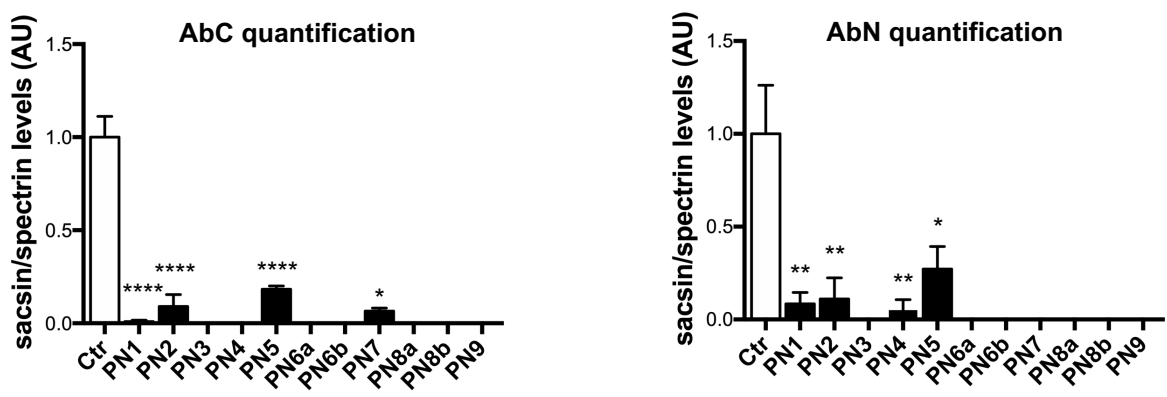**D**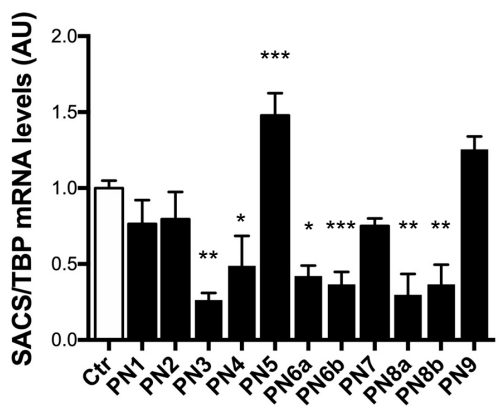**Figure 2**

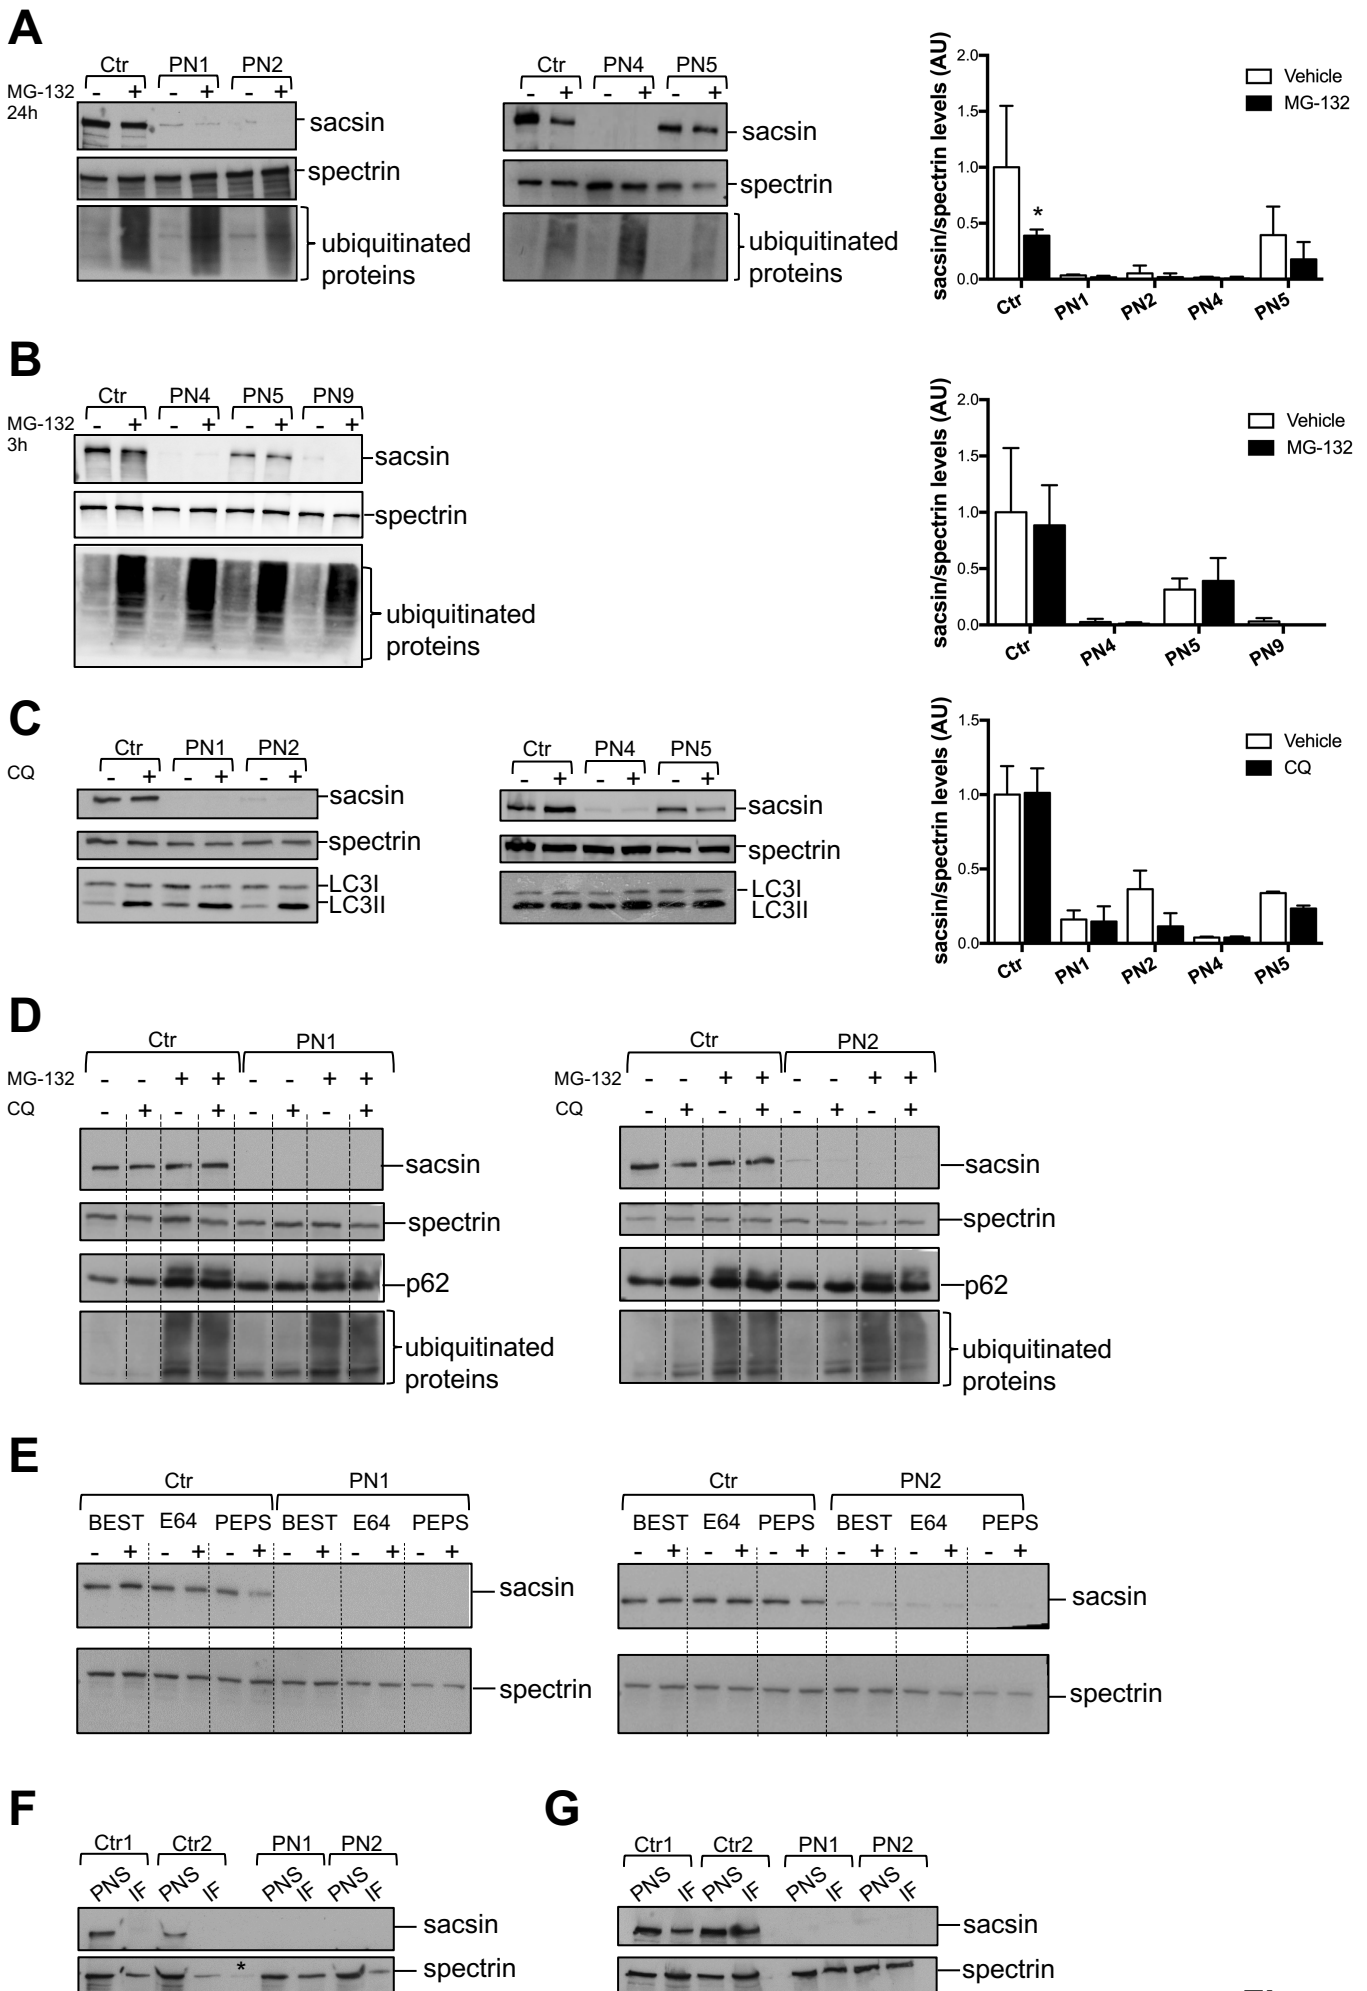

**Figure 3**

**A**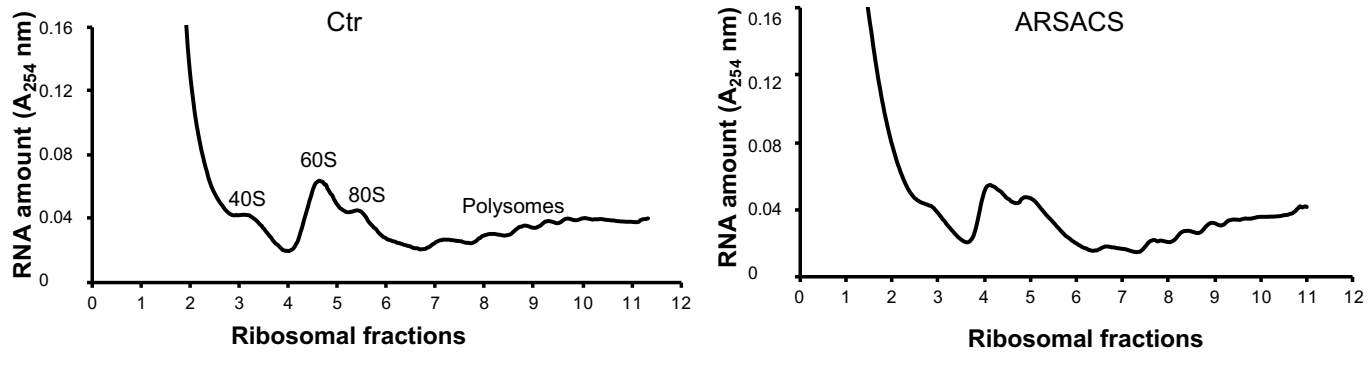**B**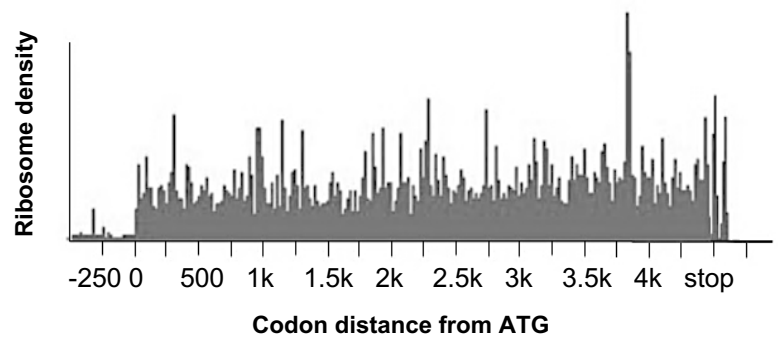**C**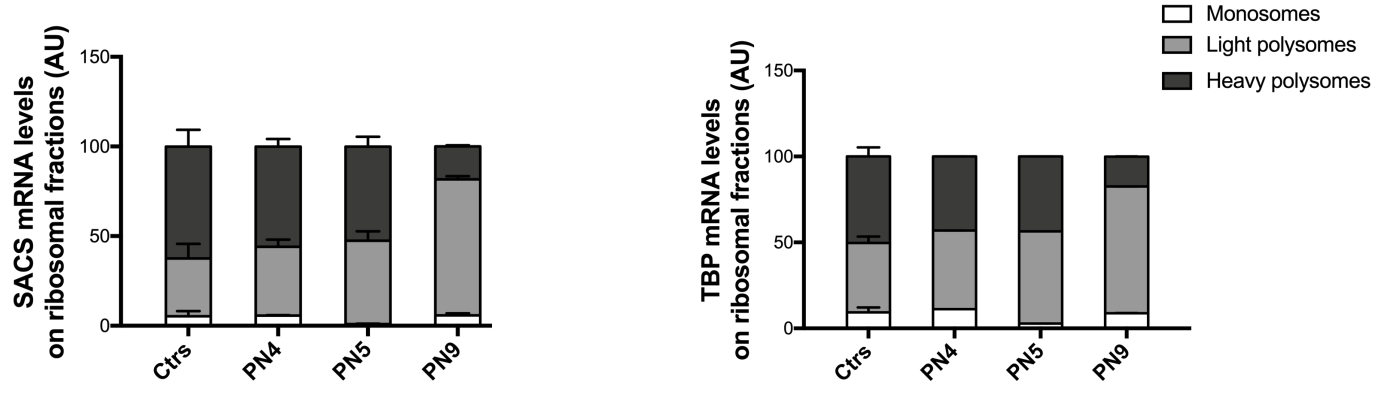**Figure 4**



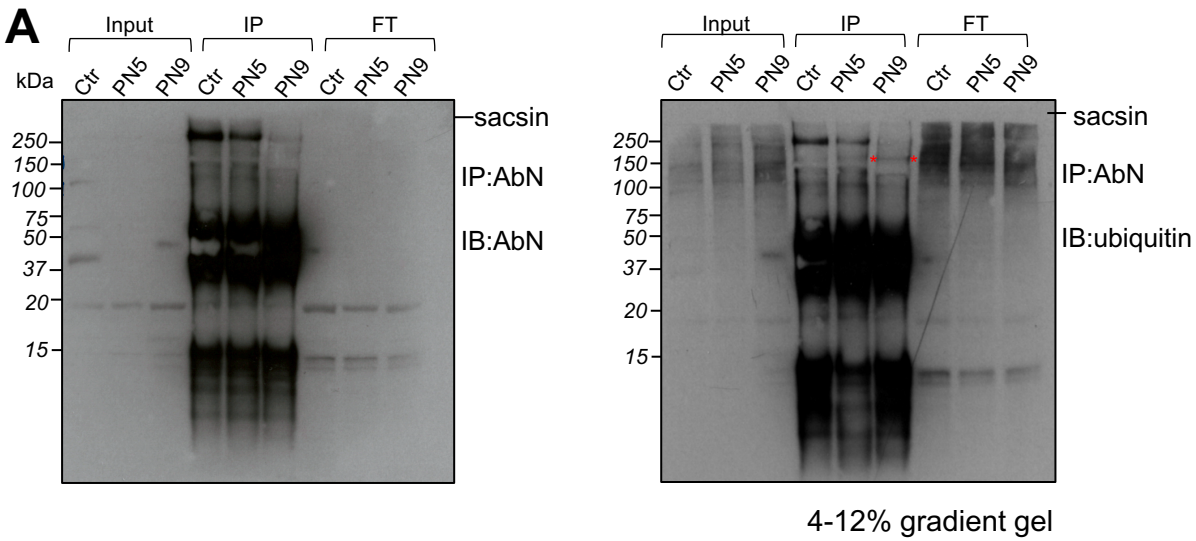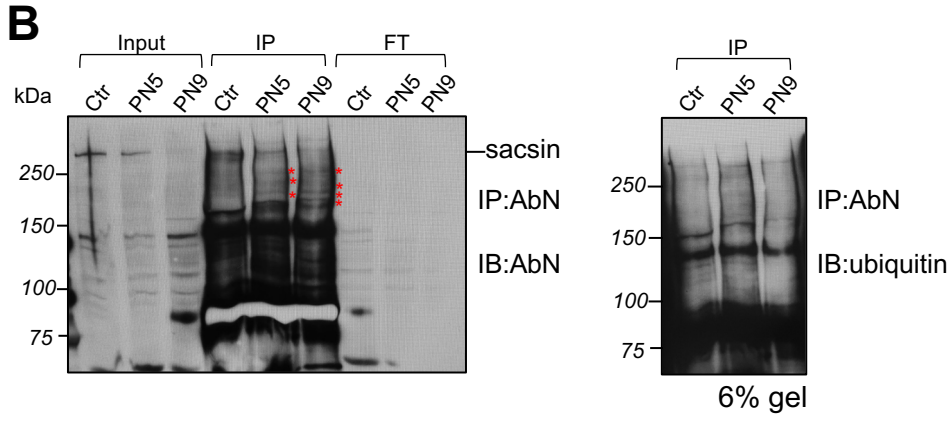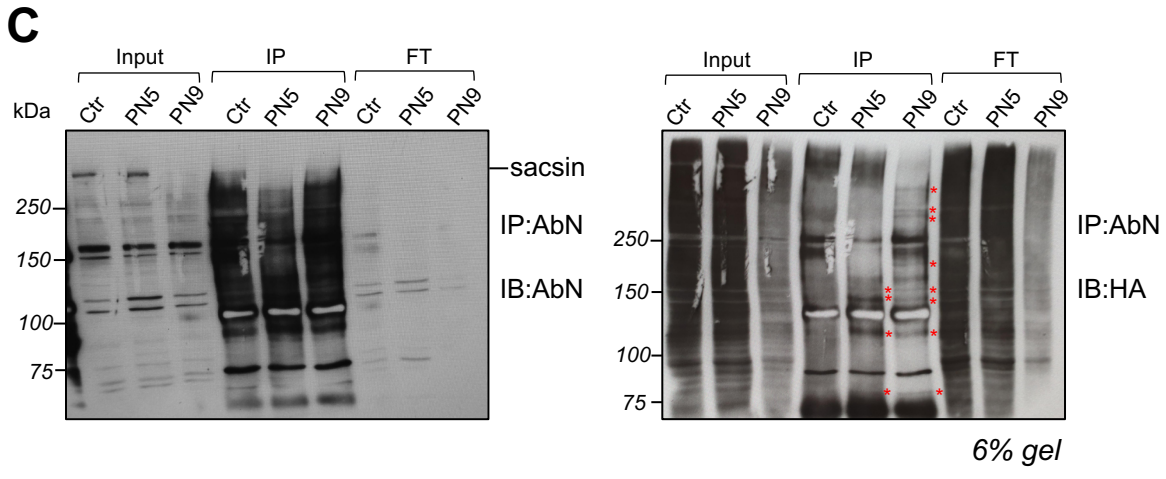

**Figure 5**

(1) SACS mRNA with frameshift/nonsense mutations

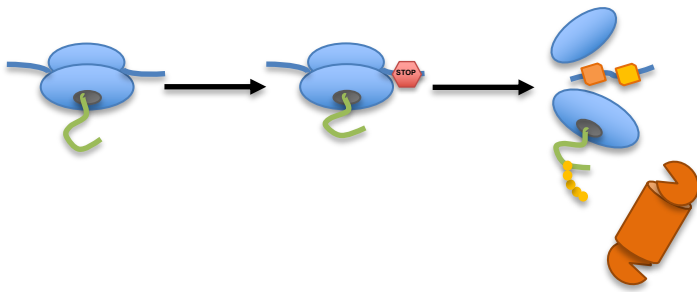

Ribosome stalling

SACS mRNA degradation

Absence/  
striking reduction of saccin

(2) SACS mRNA with missense mutations

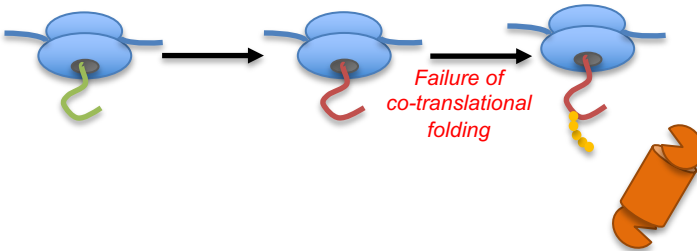

Intact ribosome

SACS mRNA stability

nascent saccin co-translational  
ubiquitination and degradation

↓  
ARSACS

Figure 6

**Table 1. Clinical features of ARSACS patients reported in this study**

| ARSACS patients                          | PN1                               | PN2                             | PN3                         | PN4                          | PN5                           | PN6a                    | PN6b                    |
|------------------------------------------|-----------------------------------|---------------------------------|-----------------------------|------------------------------|-------------------------------|-------------------------|-------------------------|
| SACS mutations                           | p.[(R3636Q; P3652T)]; [L3745fs*1] | p.[C72fs*4]; [(R3636Q; P3652T)] | p.[E723fs*15]; [F3209fs*46] | p.[L2374S]; [deleted_allele] | p.[(G188E; S2465L)]; [L3916W] | p.[S1531fs*9]; [R1645*] | p.[S1531fs*9]; [R1645*] |
| Sex                                      | M                                 | M                               | M                           | M                            | M                             | M                       | M                       |
| Age of onset                             | 15 yrs                            | >25 yrs                         | 5 yrs                       | 26 months                    | 16 yrs                        | 18 months               | 18 months               |
| Age at examination                       | 58                                | 61                              | 7                           | 63                           | 38                            | 26                      | 29                      |
| Ocular findings                          | -                                 | -                               | nv                          | +                            | nv                            | +                       | +                       |
| Dysarthria                               | ++                                | +                               | +-                          | ++                           | +-                            | ++                      | +-                      |
| Ataxia                                   | ++                                | +                               | +                           | ++                           | +                             | +                       | ++                      |
| Weakness UL/LL                           | +/+++                             | +/+++                           | -/+                         | +/+++                        | -/-                           | -/+                     | +/+                     |
| Tendon reflexes UL/LL                    | +/+++                             | +/+                             | +/+++                       | +/+                          | +/+                           | +/+++                   | -/-                     |
| Muscle atrophy UL/LL                     | +/+++                             | +/+                             | -/-                         | +/+                          | -/-                           | -/+                     | +/+                     |
| Pes cavus                                | +                                 | +                               | -                           | +                            | +                             | +                       | +                       |
| Sensory loss                             | +                                 | +                               | -                           | +++                          | +                             | +                       | +++                     |
| Bladder abnormalities                    | +                                 | +                               | -                           | catheter                     | -                             | -                       | -                       |
| DSI-ARSACS                               | nv                                | nv                              | nv / SARA score: 10/40      | nv / SARA score: 26/40       | 9                             | 17                      | 12                      |
| Walking difficulties/support/ wheelchair | wheelchair                        | wheelchair                      | Walking with support        | wheelchair                   | Walking difficulties          | Walking with support    | Walking difficulties    |
| RNFL thickness by OCT                    | nv                                | nv                              | nv                          | nv                           | +                             | ++                      | ++                      |
| Age at MRI                               | 35                                | 58                              | 5                           | 54                           | 36                            | 24                      | 25                      |
| TCC/cerebral atrophy/ WM changes         | -/-                               | -/+                             | +/-                         | -/+                          | -/-                           | -/+                     | -/-                     |
| Cerebellar atrophy (hem/vermis)          | -                                 | +                               | +                           | +++ vermis                   | + vermis                      | ++ vermis               | ++ vermis               |
| Spinal cord atrophy                      | -                                 | -                               | nv                          | nv                           | +                             | +                       | +                       |
| Additional signs                         | -                                 | -                               | -                           | Hearing impairment           | -                             | -                       | -                       |
| Reference                                | 3                                 | 3                               | Unpublished                 | 17                           | 18                            | Unpublished             | Unpublished             |

– absent, +- subtle, + present, ++ strongly present, +++ very strongly present, nv not evaluated. Abbreviations: UL=upper limbs; LL=lower limbs; DSI=disease severity index; RNFL=retinal nerve fiber layer; OCT=optical coherence tomography; MRI=magnetic resonance imaging; TCC=thin corpus callosum; WM= white matter.

| PN7                        | PN8a                               | PN8b                               | PN9                       |
|----------------------------|------------------------------------|------------------------------------|---------------------------|
| p.[I3755fs*8];<br>[D3926G] | p.[N1586fs*3];<br>[deleted_allele] | p.[N1586fs*3];<br>[deleted_allele] | p.[P536L];<br>[R632W]     |
| F                          | M                                  | F                                  | M                         |
| 14 months                  | 14 months                          | 18 months                          | 16 yrs                    |
| 37                         | 29                                 | 36                                 | 32                        |
| +                          | +                                  | +                                  | nv                        |
| -                          | -                                  | -                                  | -                         |
| ++                         | ++                                 | +                                  | -                         |
| -/+                        | +/>++                              | +/>+                               | -/>+                      |
| ++/>+++                    | -/>-                               | -/>+                               | +++/>+++                  |
| -/>+                       | ++/>++                             | +/>+                               | -/>-                      |
| +                          | +                                  | +                                  | +                         |
| ++                         | ++                                 | ++                                 | +                         |
| urgency                    | urgency                            | urgency                            | -                         |
| 16                         | 17                                 | 21                                 | nv / SARA score:<br>17/40 |
| Walking with<br>support    | Walking with<br>support            | Wheelchair                         | Walking<br>difficulties   |
| ++                         | ++                                 | ++                                 | nv                        |
| 28                         | 27                                 | 34                                 | 29                        |
| -/>-/>-                    | -/>-/>-                            | -/>+/>-/>-                         | -/>-/>-                   |
| + vermis                   | ++ vermis                          | + vermis                           | +                         |
| +                          | +                                  | +                                  | +                         |
| -                          | -                                  | -                                  | Hiatal hernia             |
| 19                         | Unpublished                        | Unpublished                        | Unpublished               |
